# Supplementary material for: Nanocrystalline cobalt oxide: a catalyst for selective alkane oxidation under ambient conditions
Source: Royal Society of Chemistry journal article supplement (doi:10.1039/b606973h), 2006-01-01
Supplement: b606973h.pdf [file b606973h.pdf]

## Electronic supplementary information

### Nanocrystalline cobalt oxide: A catalyst for selective alkane oxidation under ambient conditions

Thomas E. Davies, Tomás García, Benjamín Solsona, Stuart H. Taylor\*

Cardiff University, School of Chemistry, Main Building, Park Place, Cardiff, CF10 3AT, UK: Fax++029 2087 4075, Tel: ++029 2087 4062, email: taylorsh@cf.ac.uk

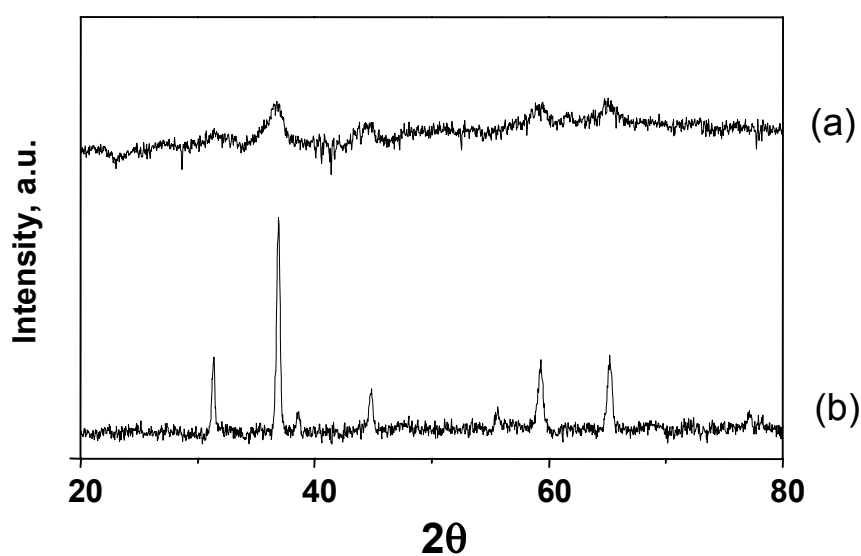

Figure S1. Powder X-ray diffraction patterns of the nanocrystalline cobalt oxide catalyst (a) and the commercially supplied cobalt oxide catalyst (b).
